# Supplementary material for: Association of a Mediterranean Diet Pattern With Adverse Pregnancy Outcomes Among US Women
Source: PubMed Central journal article supplement (PMC9857221; doi:10.1001/jamanetworkopen.2022.48165), 2022-12-22

## Supplementary Online Content

Makarem N, Chau K, Miller EC, et al. Association of a Mediterranean diet pattern with adverse pregnancy outcomes among US women. *JAMA Netw Open*. 2022;5(12):e2248165. doi:10.1001/jamanetworkopen.2022.48165

**eTable 1.** Prevalence of Adverse Pregnancy Outcomes (APOs) Stratified by Alternate Mediterranean Diet (aMed) Dietary Compliance

**eTable 2.** Univariable and Multivariable Adjusted Results for Alternate Mediterranean Diet (aMed) Score Components With Preclampsia/Eclampsia

**eTable 3.** Univariable and Multivariable Adjusted Results for Alternate Mediterranean Diet (aMed) Score Components With Gestational Diabetes

**eFigure.** Analysis Sample Selection Flow Diagram

This supplementary material has been provided by the authors to give readers additional information about their work.

**eTable 1.** Prevalence of Adverse Pregnancy Outcomes (APOs) Stratified by Alternate Mediterranean Diet (aMed) Dietary Compliance

|                                              | Low<br>(N=2980) | Moderate<br>(N=2430) | High<br>(N=2388) | p-value* |
|----------------------------------------------|-----------------|----------------------|------------------|----------|
| <b>Any APO<br/>(N=2747)</b>                  | 1137 (38.2%)    | 849 (34.9%)          | 761 (31.9%)      | <0.001   |
| <b>Preeclampsia/eclampsia<br/>(N=606)</b>    | 276 (9.3%)      | 184 (7.6%)           | 146 (6.1%)       | <0.001   |
| <b>Gestational hypertension<br/>(N=1106)</b> | 443 (14.9%)     | 334 (13.7%)          | 329 (13.8%)      | 0.419    |
| <b>Gestational diabetes<br/>(N=300)</b>      | 122 (4.1%)      | 104 (4.3%)           | 74 (3.1%)        | 0.066    |
| <b>Preterm birth<br/>(N=544)</b>             | 229 (7.7%)      | 167 (6.9%)           | 148 (6.2%)       | 0.102    |
| <b>Small for gestational age<br/>(N=765)</b> | 331 (11.1%)     | 225 (9.3%)           | 209 (8.8%)       | 0.010    |
| <b>Stillbirth<br/>(N=38)</b>                 | 19 (0.6%)       | 8 (0.3%)             | 11 (0.5%)        | 0.262    |

aMed score categories defined as low (0-3), moderate (4-5), high (6-9) compliance

**eTable 2.** Univariable and Multivariable Adjusted Results for Alternate Mediterranean Diet (aMed) Score Components With Preclampsia/Eclampsia

| Outcome           | Unadjusted       |         | Adjusted*        |         |
|-------------------|------------------|---------|------------------|---------|
|                   | OR (95% CI)      | p-value | OR (95% CI)      | p-value |
| Vegetable Score   | 0.73 (0.62,0.87) | <0.001  | 0.78 (0.63,0.95) | 0.01    |
| Fruit Score       | 0.70 (0.59,0.83) | <0.001  | 0.73 (0.60,0.89) | 0.002   |
| Nut Score         | 0.90 (0.76,1.07) | 0.23    | 0.98 (0.81,1.19) | 0.82    |
| Whole Grain Score | 0.77 (0.65,0.91) | 0.002   | 0.86 (0.71,1.04) | 0.13    |
| Legumes Score     | 0.79 (0.67,0.94) | 0.01    | 0.91 (0.75,1.10) | 0.32    |
| Fish Score        | 0.78 (0.66,0.92) | 0.003   | 0.83 (0.69,1.00) | 0.05    |
| MUFA:SFA Score    | 0.95 (0.81,1.13) | 0.58    | 0.94 (0.78,1.13) | 0.52    |
| Red Meat Score    | 0.86 (0.73,1.02) | 0.08    | 0.96 (0.80,1.15) | 0.67    |
| Alcohol Score     | 0.85 (0.69,1.04) | 0.12    | 0.91 (0.72,1.14) | 0.42    |

\* Adjusting for age, education, race/ethnicity, marital status, body mass index, smoking, family history of cardiovascular disease.

MUFA : SFA = monounsaturated to saturated fat ratio

**eTable 3.** Univariable and Multivariable Adjusted Results for Alternate Mediterranean Diet (aMed) Score Components With Gestational Diabetes

| Outcome           | Unadjusted       |         | Adjusted*        |         |
|-------------------|------------------|---------|------------------|---------|
|                   | OR (95% CI)      | p-value | OR (95% CI)      | p-value |
| Vegetable Score   | 0.88 (0.70,1.11) | 0.30    | 0.72 (0.55,0.95) | 0.02    |
| Fruit Score       | 0.86 (0.68,1.08) | 0.20    | 0.84 (0.64,1.10) | 0.21    |
| Nut Score         | 0.97 (0.77,1.22) | 0.77    | 0.94 (0.73,1.23) | 0.67    |
| Whole Grain Score | 0.82 (0.65,1.03) | 0.09    | 0.83 (0.64,1.08) | 0.17    |
| Legumes Score     | 0.95 (0.76,1.20) | 0.69    | 0.99 (0.76,1.29) | 0.94    |
| Fish Score        | 0.94 (0.75,1.19) | 0.61    | 0.84 (0.65,1.09) | 0.19    |
| MUFA:SFA Score    | 1.00 (0.79,1.26) | 0.99    | 0.95 (0.73,1.24) | 0.71    |
| Red Meat Score    | 0.69 (0.55,0.87) | 0.002   | 0.73 (0.57,0.95) | 0.02    |
| Alcohol Score     | 0.94 (0.70,1.24) | 0.66    | 0.92 (0.67,1.24) | 0.58    |

\* Adjusting for age, education, race/ethnicity, marital status, body mass index, smoking, family history of cardiovascular disease.

MUFA : SFA = monounsaturated to saturated fat ratio

**eFigure.** Analysis Sample Selection Flow Diagram

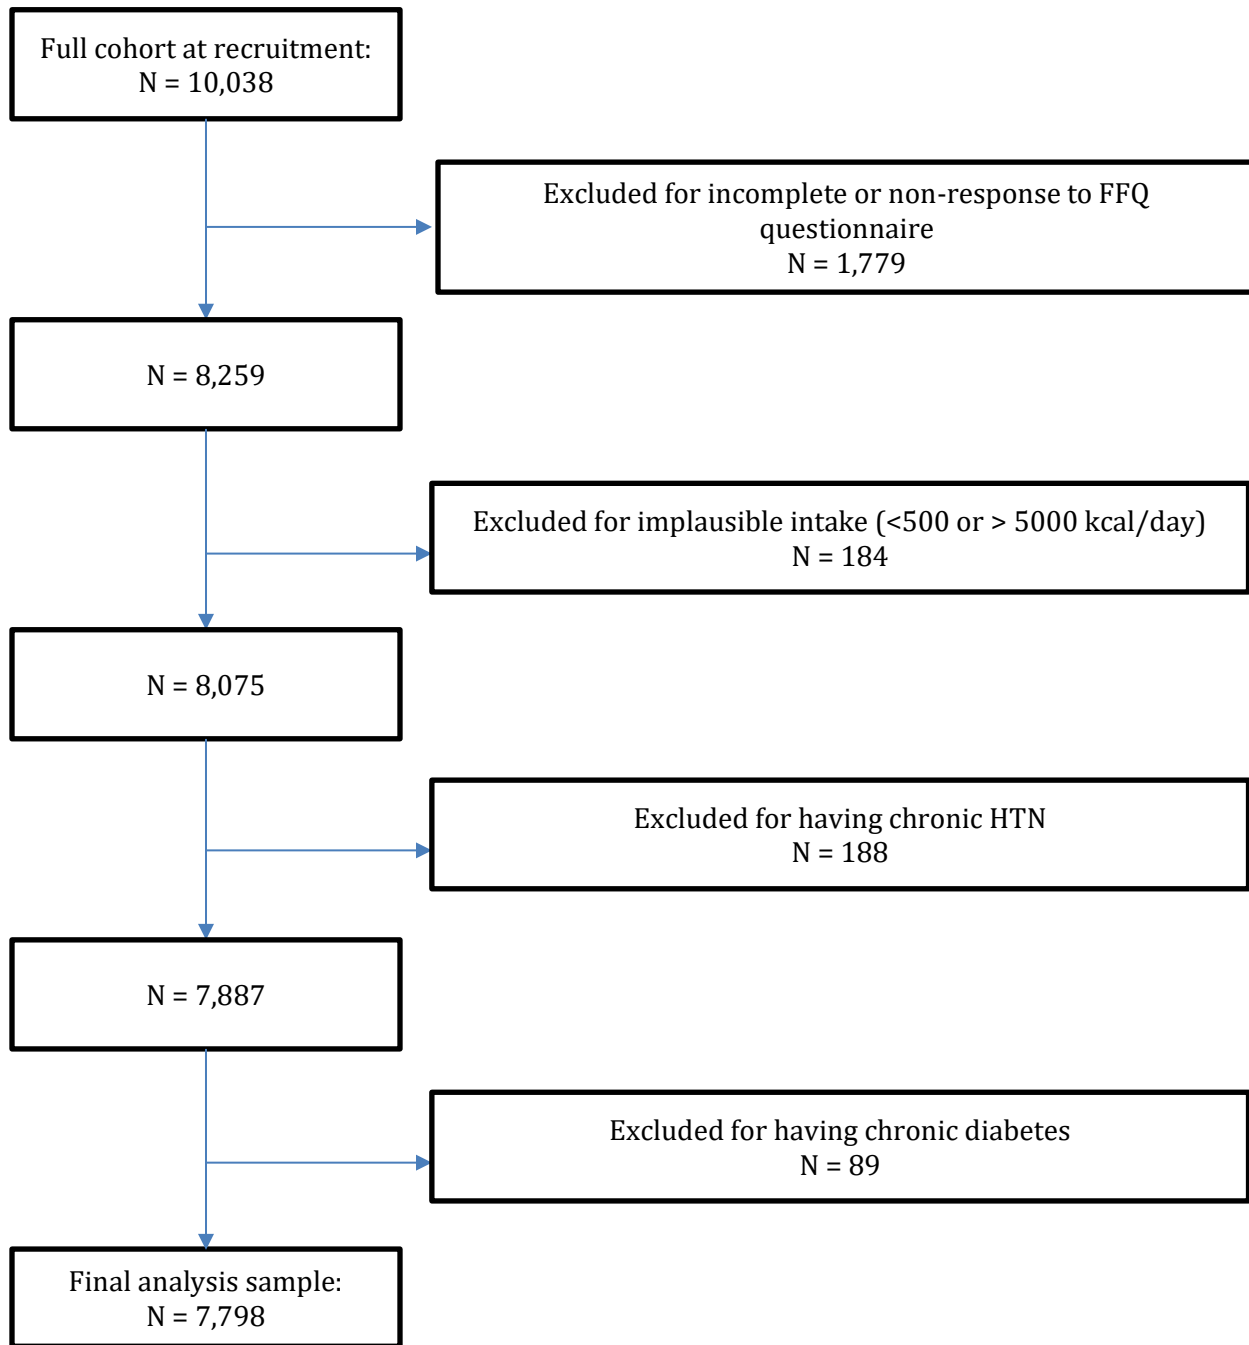

Supplement: jamanetwopen-e2248165-s001.pdf [file jamanetwopen-e2248165-s001.pdf]
