# Supplementary material for: Association of a Mediterranean Diet Pattern With Adverse Pregnancy Outcomes Among US Women
Source: PubMed Central journal article supplement (PMC9857221; doi:10.1001/jamanetworkopen.2022.48165), 2022-12-22
Supplement: jamanetwopen-e2248165-s002.pdf [file jamanetwopen-e2248165-s002.pdf]

## Data Sharing Statement

Makarem. Association of a Mediterranean Diet Pattern With Adverse Pregnancy Outcomes Among US Women. *JAMA Netw Open*. Published December 22, 2022.

doi:10.1001/jamanetworkopen.2022.48165

### Data

**Data available:** Yes

**Data types:** Deidentified participant data

**How to access data:** Deidentified patient data is available on DASH

<https://dash.nichd.nih.gov/study/226675>

**When available:** beginning date: 10-14-2022

### Supporting Documents

**Document types:** None

### Additional Information

**Who can access the data:** Please follow the instructions on the DASH website to access data. <https://dash.nichd.nih.gov/study/226675>

**Types of analyses:** Please follow the instructions on the DASH website to access data.

<https://dash.nichd.nih.gov/study/226675>

**Mechanisms of data availability:** Please follow the instructions on the DASH website to access data. <https://dash.nichd.nih.gov/study/226675>

**Any additional restrictions:** Please follow the instructions on the DASH website to access data. <https://dash.nichd.nih.gov/study/226675>
